# Supplementary material
Source: Springer Nature journal article supplement (https://www.springermedizin.de/resource/supplementary/12889_2014_6889_MOESM3_ESM.pdf/9499152)
Supplement: MOESM3 [file 9499152]

**Figure 3. Components of physical activity program**

| <b>Physical activity phases</b>                                                                                                                                               | <b>Level 1<br/>Induction<br/>(Week 2-6)<br/>Duration, Target<br/>intensity</b> | <b>Level 2<br/>Development<br/>(Week 7-12)<br/>Duration, intensity</b> | <b>Level 3<br/>Maintenance<br/>(Week 13-23)<br/>Duration, intensity</b> |
|-------------------------------------------------------------------------------------------------------------------------------------------------------------------------------|--------------------------------------------------------------------------------|------------------------------------------------------------------------|-------------------------------------------------------------------------|
| <b>Warm-up phase:</b> Involving all parts of the body: neck, upper limbs, lower limbs                                                                                         | 10 minutes,<br>50% of MHR                                                      | 10 minutes,<br>50% of MHR                                              | 10 minutes,<br>(MHR) 50%                                                |
| <b>Aerobic phase:</b> Walking, running, dancing or bicycling.                                                                                                                 | 20 minutes<br>(THR) 55%                                                        | 30 minutes<br>(THR) 55-75%                                             | 40 minutes<br>(THR) 60-75%                                              |
| <b>Recovery phase:</b> Gradually reduce the intensity. Stretch, bend and rotate body parts starting with the neck and concluding with the ankles, emphasizing deep breathing. | 5-10 minutes                                                                   | 5-10 minutes                                                           | 5-10 minutes                                                            |

MHR: Maximum heart rate (220-age). THR: Training Heart Rate.

Reference: Fox III, SM Naughton, JP and Haskell, WL. ***Physical activity and the prevention of coronary heart disease.*** *Ann Clin Res* 1971; **3**:404-432
